# Supplementary material for: Human papillomavirus E5 suppresses immunity via inhibition of the immunoproteasome and STING pathway
Source: PubMed Central journal article supplement — Cell Rep. Author manuscript; Available in PMC 2024 Jan 15. (PMC10789500; doi:10.1016/j.celrep.2023.112508), 2023-05-11
Supplement: NIHMS1943882-supplement-Supplementary_Material.pdf [file NIHMS1943882-supplement-Supplementary_Material.pdf]

**Cell Reports, Volume 42**

**Supplemental information**

**Human papillomavirus E5**

**suppresses immunity via inhibition**

**of the immunoproteasome and STING pathway**

**Sayuri Miyauchi, Sangwoo S. Kim, Riley N. Jones, Lin Zhang, Kripa Guram, Sonia Sharma, Stephen P. Schoenberger, Ezra E.W. Cohen, Joseph A. Califano, and Andrew B. Sharabi**

# Supplementary Information

## Supplementary Figure 1

**A**

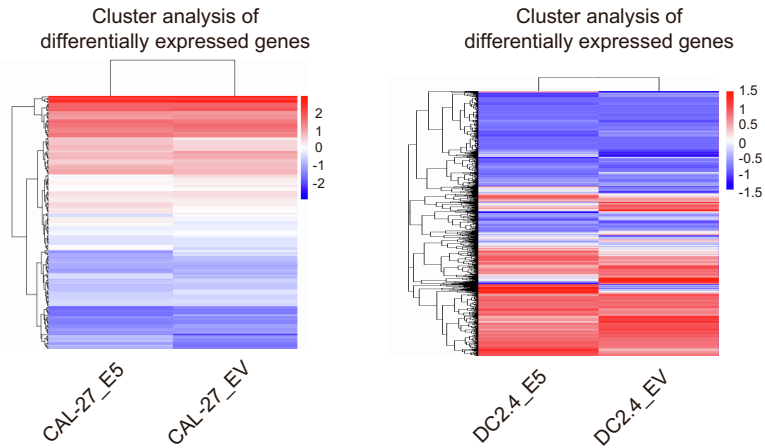

**B**

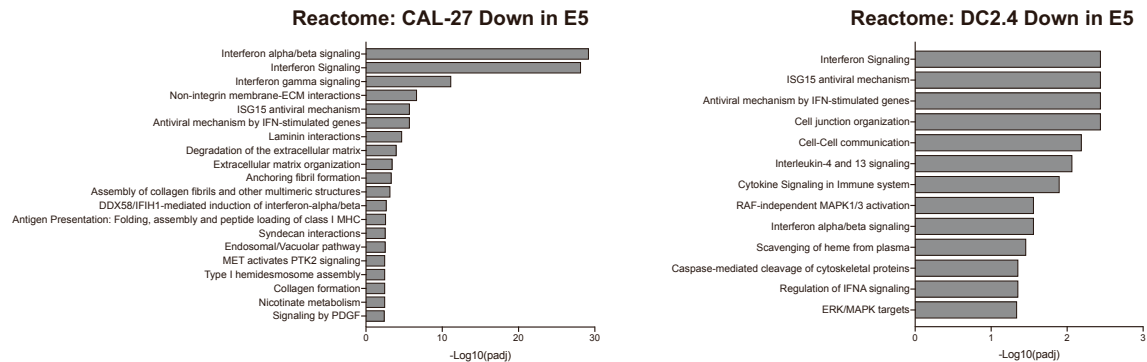

**C**

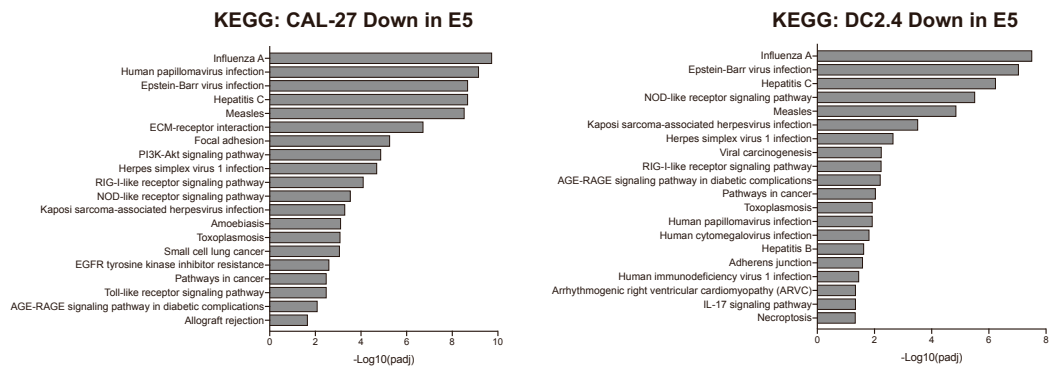

### Supplementary Figure 1: HPV E5 downregulated viral response pathways

**A)** Heatmap of differentially expressed genes. **B)** Reactome analysis of downregulated gene sets. **C)** KEGG analysis of downregulated gene sets.

**Supplementary Table 1: Top downregulated genes in E5-positive CAL-27**

| <b>Gene Name</b> | <b>Fold change</b> | <b>Adjusted<br/>P-value</b> | <b>FPKM<br/>CAL-27 EV</b> | <b>FPKM<br/>CAL-27 E5</b> |
|------------------|--------------------|-----------------------------|---------------------------|---------------------------|
| OASL             | 0.20585494         | 5.28E-116                   | 28.2547705                | 2.16472548                |
| DDX60            | 0.27654765         | 2.07E-88                    | 14.0582601                | 2.35425262                |
| RSAD2            | 0.3526967          | 3.46E-45                    | 7.93781042                | 0.64969887                |
| IFIT3            | 0.38804611         | 9.74E-55                    | 49.6632345                | 14.7160041                |
| IFIT1            | 0.40189764         | 3.23E-38                    | 18.7138658                | 4.5901364                 |
| IFI44            | 0.42322595         | 3.44E-44                    | 64.4497237                | 21.1996557                |
| MX1              | 0.42398937         | 1.24E-50                    | 33.2535915                | 11.5402072                |
| DDX58            | 0.45426309         | 8.85E-34                    | 14.4226315                | 4.96366001                |
| ISG15            | 0.45697907         | 9.04E-39                    | 165.093363                | 61.2381005                |
| IFIT2            | 0.46245984         | 1.84E-31                    | 20.8820024                | 7.26362257                |
| IFI27            | 0.47067398         | 1.25E-31                    | 37.0986363                | 13.5801914                |
| XAF1             | 0.51819249         | 2.13E-17                    | 6.3929787                 | 1.74286583                |
| IFI6             | 0.53665618         | 3.57E-17                    | 64.3272435                | 24.6398335                |
| CMPK2            | 0.53712881         | 1.24E-15                    | 8.98404844                | 2.84133502                |
| MX2              | 0.55431194         | 5.73E-14                    | 5.74477118                | 1.84536607                |
| IFI44L           | 0.55979092         | 2.89E-15                    | 2.96353893                | 0.40546305                |
| OAS3             | 0.5808832          | 3.99E-30                    | 46.5294403                | 25.0894155                |
| FGF2             | 0.58795188         | 3.84E-11                    | 2.61036847                | 0.82970054                |
| HELZ2            | 0.58908185         | 8.69E-22                    | 18.1552128                | 9.65857185                |
| OAS2             | 0.59776901         | 2.74E-16                    | 19.2031441                | 10.0204605                |
| SAMHD1           | 0.59812959         | 1.37E-14                    | 14.7453687                | 7.49327483                |
| HERC6            | 0.60461136         | 6.25E-10                    | 5.54509733                | 2.01038865                |
| SAMD9L           | 0.60815459         | 3.43E-11                    | 5.76178799                | 2.75429105                |
| TRIM22           | 0.60825155         | 4.96E-10                    | 9.8351385                 | 4.22694954                |
| HERC5            | 0.61005026         | 6.44E-11                    | 3.07628624                | 0.59746944                |
| OAS1             | 0.62073956         | 4.70E-09                    | 14.7297645                | 6.38642767                |
| IL7R             | 0.64212675         | 5.28E-14                    | 24.4826588                | 14.3186334                |
| EPSTI1           | 0.65724811         | 7.23E-07                    | 3.27352964                | 1.21220196                |
| CXCL11           | 0.66512159         | 2.09E-06                    | 10.0823504                | 4.05635429                |
| GBP4             | 0.6668342          | 2.73E-06                    | 2.82929781                | 1.21391394                |
| ZC3HAV1          | 0.66859293         | 5.67E-13                    | 20.9096906                | 12.9883044                |
| PLEKHG4B         | 0.67100713         | 1.91E-06                    | 2.90346572                | 1.5102178                 |
| DDX60L           | 0.6914611          | 3.37E-05                    | 3.65152642                | 1.86458059                |
| CCND2            | 0.69286203         | 4.12E-05                    | 2.38497946                | 1.05011191                |
| HLA-B            | 0.70059374         | 9.48E-09                    | 137.00686                 | 88.923987                 |
| IRF7             | 0.70527118         | 0.00013977                  | 7.84847568                | 3.74171508                |
| STAT2            | 0.70753332         | 5.10E-10                    | 44.7714327                | 29.8922999                |
| CXCL10           | 0.72080454         | 0.00023756                  | 8.90919336                | 3.48256381                |
| DHX58            | 0.72092446         | 0.00044284                  | 5.1013706                 | 2.30511518                |
| HLA-DPA1         | 0.72521466         | 0.00030729                  | 6.81365709                | 4.14931752                |
| SAMD9            | 0.72920684         | 3.40E-08                    | 22.5532906                | 15.5921649                |
| FBN2             | 0.73614405         | 5.62E-05                    | 6.27815436                | 4.19834159                |
| LY6E             | 0.73803442         | 8.10E-07                    | 164.859424                | 114.794171                |
| RP11-1E6.1       | 0.73905826         | 0.0015712                   | 18.6255058                | 8.35772182                |
| PARP14           | 0.74022717         | 1.14E-07                    | 19.3471161                | 13.629367                 |
| LAPTM5           | 0.74264261         | 4.34E-07                    | 60.7685332                | 42.8497939                |
| ZNF1             | 0.74478711         | 4.34E-08                    | 28.342725                 | 20.2228719                |
| AXL              | 0.74643058         | 4.53E-07                    | 42.061007                 | 29.8624855                |
| ANKRD10          | 0.74788067         | 1.09E-05                    | 42.0754343                | 29.5137203                |

**Supplementary Table 2: Top upregulated genes in E5-positive CAL-27**

| <b>Gene Name</b> | <b>Fold change</b> | <b>Adjusted<br/>P-value</b> | <b>FPKM<br/>CAL-27_EV</b> | <b>FPKM<br/>CAL-27_E5</b> |
|------------------|--------------------|-----------------------------|---------------------------|---------------------------|
| <b>KRT16</b>     | 1.62881189         | 8.68E-22                    | 65.1833556                | 113.540158                |
| <b>PI3</b>       | 1.56110762         | 2.13E-15                    | 211.513756                | 356.484238                |
| <b>NDRG1</b>     | 1.5380581          | 1.07E-10                    | 15.1308274                | 26.1903942                |
| <b>LUM</b>       | 1.52260318         | 8.57E-07                    | 3.08267475                | 6.85535927                |
| <b>CA12</b>      | 1.48407088         | 2.73E-06                    | 2.4746019                 | 4.69918787                |
| <b>SPRR1B</b>    | 1.46937232         | 6.29E-07                    | 44.1338198                | 75.4437704                |
| <b>TNFRSF10D</b> | 1.43243532         | 1.91E-06                    | 9.03672119                | 14.6092984                |
| <b>TMPRSS11D</b> | 1.42016642         | 0.00011667                  | 4.05690481                | 7.70654042                |
| <b>KRT17</b>     | 1.40296595         | 1.07E-09                    | 271.062116                | 399.056226                |
| <b>SLPI</b>      | 1.39983812         | 6.67E-08                    | 286.91989                 | 427.877323                |
| <b>SPRR1A</b>    | 1.39911059         | 0.00028724                  | 21.1559697                | 38.1828552                |
| <b>GPNMB</b>     | 1.38536872         | 0.00036267                  | 6.23736914                | 10.6161984                |
| <b>DSG3</b>      | 1.37456011         | 3.43E-11                    | 34.498636                 | 48.9027974                |
| <b>LTF</b>       | 1.35281072         | 3.15E-05                    | 0.35760137                | 1.91497023                |
| <b>IL1RAP</b>    | 1.34642139         | 6.29E-07                    | 29.7671368                | 41.9652561                |
| <b>ABCA13</b>    | 1.34146554         | 0.0002346                   | 2.11981707                | 3.11482501                |
| <b>AHNAK2</b>    | 1.33863255         | 1.43E-06                    | 5.00543432                | 7.00648461                |
| <b>CLCA2</b>     | 1.33149776         | 0.00058978                  | 8.42548094                | 12.3478012                |
| <b>KRT1</b>      | 1.32683594         | 0.0071531                   | 3.61845454                | 6.61939069                |
| <b>KRT6B</b>     | 1.32657845         | 2.16E-05                    | 31.4542266                | 44.031796                 |
| <b>CTSC</b>      | 1.32497946         | 1.14E-07                    | 108.070891                | 147.753696                |
| <b>GJB6</b>      | 1.31792658         | 0.0077091                   | 2.70260136                | 5.40744353                |
| <b>FABP5</b>     | 1.30589599         | 0.0018975                   | 54.1001418                | 77.1381011                |
| <b>LRRC8C</b>    | 1.30271365         | 0.0053041                   | 3.64925009                | 5.29690218                |

**Supplementary Table 3: Top downregulated genes in E5-positive DC2.4**

| Gene Name | Fold change | Adjusted <i>P</i> -value | FPKM DC2.4 EV | FPKM DC2.4 E5 |
|-----------|-------------|--------------------------|---------------|---------------|
| Ly6c2     | 0.26473117  | 7.54E-78                 | 37.8857195    | 8.04235854    |
| Syne2     | 0.29160755  | 8.77E-41                 | 1.91561867    | 0.34139549    |
| Ifit2     | 0.31514769  | 1.63E-89                 | 71.8279836    | 20.36798      |
| Siglec1   | 0.31707587  | 9.65E-32                 | 4.62693901    | 0.78105596    |
| Tinagl1   | 0.35225693  | 5.40E-45                 | 41.7094247    | 12.2062977    |
| Pyhin1    | 0.3553469   | 1.41E-24                 | 7.59518274    | 1.37840744    |
| Ifit3     | 0.36455288  | 2.62E-24                 | 16.48767      | 3.44003573    |
| Erich3    | 0.37956004  | 2.32E-22                 | 4.34208926    | 0             |
| Bcor      | 0.39291795  | 2.53E-30                 | 8.71442236    | 2.75193113    |
| Ifi204    | 0.39878969  | 2.33E-27                 | 24.9337321    | 7.79140053    |
| Ifit1     | 0.40086823  | 1.01E-40                 | 50.799994     | 17.9649303    |
| Apol9b    | 0.40125743  | 2.36E-33                 | 56.7842438    | 19.2443502    |
| Gbp3      | 0.40460891  | 2.48E-25                 | 17.3159943    | 5.39121417    |
| Mpeg1     | 0.43155011  | 2.17E-18                 | 7.52927912    | 2.29161454    |
| Sfn4      | 0.44590244  | 1.73E-41                 | 71.6897978    | 29.6451154    |
| Eya2      | 0.44794702  | 7.82E-15                 | 9.4013417     | 2.58770032    |
| Apol9a    | 0.44850625  | 1.83E-26                 | 60.3127618    | 23.5008423    |
| Ccl2      | 0.46933827  | 1.76E-30                 | 217.283927    | 93.0200214    |
| Ddx60     | 0.47721126  | 1.96E-20                 | 11.6463808    | 4.78296755    |
| Saa3      | 0.47827093  | 9.77E-12                 | 35.031086     | 8.7007943     |
| Gbp7      | 0.47830408  | 1.34E-35                 | 34.545993     | 15.4675027    |
| Lgals9    | 0.48659723  | 1.34E-30                 | 92.2877428    | 41.6883014    |
| Sfn2      | 0.49076355  | 1.17E-21                 | 55.8428841    | 24.3992852    |
| Ephb2     | 0.49530875  | 2.99E-11                 | 1.89493123    | 0.61031994    |
| C3        | 0.49640859  | 5.19E-32                 | 40.4331438    | 18.8604452    |
| Parp14    | 0.49927272  | 3.56E-37                 | 37.9631656    | 18.0431458    |
| Oasl2     | 0.50325099  | 4.51E-35                 | 119.93654     | 57.3541345    |
| Ifi203    | 0.5056216   | 1.88E-27                 | 75.8344812    | 35.7747479    |
| Isg20     | 0.50563211  | 1.88E-14                 | 54.0722455    | 22.6544335    |
| Phf11d    | 0.50791888  | 1.05E-27                 | 54.7725304    | 26.0122539    |
| Ili1b     | 0.51473436  | 1.34E-09                 | 8.24508305    | 1.64070787    |
| Cmpk2     | 0.5170838   | 5.66E-20                 | 35.8001685    | 16.8205316    |
| Gbp2      | 0.52186914  | 4.80E-09                 | 5.47303245    | 1.50450766    |
| Rsad2     | 0.52362649  | 2.47E-25                 | 57.4813494    | 28.2502193    |
| Herc6     | 0.52449466  | 3.54E-18                 | 16.265493     | 7.70851234    |
| Sfn5      | 0.52705667  | 7.36E-09                 | 2.79814516    | 0.63916655    |
| Gimap9    | 0.53242492  | 5.21E-09                 | 14.2778844    | 5.15018576    |
| Cxcl10    | 0.53397348  | 1.24E-08                 | 17.3241766    | 5.82031023    |
| Dhx58     | 0.53427336  | 1.20E-18                 | 35.1650595    | 17.2242221    |
| Irf7      | 0.53428447  | 6.53E-39                 | 193.31785     | 100.129322    |
| Cxcr2     | 0.53462159  | 4.85E-09                 | 2.75347903    | 0.41852435    |
| Ifih1     | 0.54815659  | 4.21E-18                 | 20.4669263    | 10.3956105    |
| Met       | 0.55145306  | 6.38E-15                 | 10.6711307    | 5.33694879    |
| BC007180  | 0.55150658  | 1.97E-10                 | 0.97688675    | 0             |
| Ifitm3    | 0.55285383  | 4.77E-19                 | 304.203158    | 157.187693    |
| Myl1      | 0.55445797  | 2.62E-10                 | 5.0722773     | 0             |
| Igtp      | 0.55546195  | 1.20E-10                 | 21.0184571    | 9.92726236    |
| Map1a     | 0.55774594  | 9.50E-09                 | 2.58084022    | 1.13188839    |
| Isg15     | 0.55780779  | 2.45E-24                 | 287.439026    | 153.227294    |
| Bco2      | 0.5592247   | 2.02E-09                 | 15.9099322    | 7.31125143    |
| Irg1      | 0.56027227  | 3.51E-07                 | 4.8189983     | 1.45549717    |
| Gimap4    | 0.56090564  | 7.83E-08                 | 4.26611991    | 0.70666583    |
| Ly6a      | 0.56229924  | 9.48E-08                 | 9.60156683    | 1.63583036    |
| Trim12c   | 0.56816426  | 1.75E-12                 | 18.364503     | 9.40676187    |
| Ocstamp   | 0.57405465  | 7.10E-07                 | 4.80622814    | 1.91163989    |
| Sp100     | 0.57554475  | 2.77E-17                 | 31.7461403    | 17.2384373    |
| Znfx1     | 0.57753088  | 2.08E-29                 | 43.3329523    | 24.3672103    |
| Stat2     | 0.57788727  | 7.18E-17                 | 38.1774272    | 20.8175429    |
| Tgtp2     | 0.58163662  | 2.61E-06                 | 4.98042026    | 1.7245595     |
| Enpp4     | 0.58253232  | 7.92E-13                 | 16.1996997    | 8.69184534    |
| Sdc3      | 0.58562945  | 4.16E-12                 | 14.4249172    | 7.75142771    |
| Gbp6      | 0.58673868  | 2.21E-06                 | 2.25270861    | 0.55291198    |
| Irgm1     | 0.58712517  | 2.94E-21                 | 44.5642732    | 25.2004588    |
| Samd9l    | 0.58731647  | 5.27E-19                 | 33.1728316    | 18.6533091    |
| Helz2     | 0.58878793  | 1.02E-31                 | 55.6672659    | 32.1154748    |
| Parp9     | 0.58973552  | 2.08E-20                 | 50.8941578    | 28.8836805    |
| Klf2      | 0.59106553  | 5.18E-10                 | 28.5261622    | 15.134781     |
| Phf11b    | 0.59107373  | 5.83E-06                 | 9.18529333    | 2.92554395    |
| Stat1     | 0.59877255  | 7.88E-11                 | 13.10114      | 7.19678653    |
| Xaf1      | 0.59967802  | 2.67E-11                 | 27.0890742    | 15.0021322    |

**Supplementary Table 4: Top upregulated genes in E5-positive DC2.4**

| Gene Name            | Fold change | Adjusted<br>P-value | FPKM<br>DC2.4 EV | FPKM<br>DC2.4 E5 |
|----------------------|-------------|---------------------|------------------|------------------|
| <b>Slc43a3</b>       | 8.90243502  | 6.62E-118           | 0.45956638       | 20.497042        |
| <b>Chm</b>           | 6.33392595  | 5.72E-75            | 0.00684038       | 5.83725985       |
| <b>Igf2r</b>         | 4.62835652  | 1.45E-112           | 2.49136084       | 14.7368281       |
| <b>Hk3</b>           | 4.12816318  | 2.05E-58            | 2.89685488       | 19.7741695       |
| <b>Inpp4b</b>        | 3.83174087  | 3.95E-39            | 0.1957859        | 3.90599108       |
| <b>Rgs1</b>          | 3.78895499  | 1.14E-44            | 0.96254556       | 7.0898984        |
| <b>Itgam</b>         | 3.7685251   | 2.76E-71            | 3.80418986       | 18.7171052       |
| <b>Chchd10</b>       | 3.6007564   | 6.98E-36            | 0.17291171       | 16.9110059       |
| <b>Gpmb</b>          | 3.48824168  | 8.75E-223           | 59.2076901       | 219.178699       |
| <b>Pde3b</b>         | 3.42190569  | 7.48E-33            | 0.08972205       | 2.57952151       |
| <b>Cd36</b>          | 3.15054191  | 1.33E-28            | 0.47591795       | 5.33561727       |
| <b>N4bp2</b>         | 2.93365659  | 1.25E-25            | 0.05440088       | 1.53229408       |
| <b>Lincenc1</b>      | 2.93284332  | 2.04E-26            | 1.54084519       | 9.60705575       |
| <b>Dock10</b>        | 2.69260014  | 5.82E-34            | 2.65445288       | 9.16684435       |
| <b>Gpr65</b>         | 2.68235466  | 7.64E-24            | 3.29951312       | 14.8663267       |
| <b>Ddr2</b>          | 2.6158866   | 6.08E-21            | 0.05574313       | 1.48401119       |
| <b>Hpgds</b>         | 2.48457656  | 5.26E-18            | 0.43313898       | 4.00450499       |
| <b>Cst7</b>          | 2.38700237  | 2.33E-16            | 1.99139468       | 14.6679408       |
| <b>Fam213a</b>       | 2.17588152  | 5.27E-13            | 2.10496534       | 9.94239511       |
| <b>Rgs2</b>          | 2.10351193  | 2.14E-16            | 5.62612537       | 15.116801        |
| <b>Atp1a3</b>        | 2.05523021  | 1.83E-13            | 2.79744313       | 7.84741094       |
| <b>Tle3</b>          | 1.99563794  | 2.10E-27            | 6.57824811       | 14.3462396       |
| <b>Abcb4</b>         | 1.96719504  | 2.56E-10            | 1.92001438       | 5.90042111       |
| <b>Arsg</b>          | 1.96309501  | 2.62E-15            | 7.01337978       | 16.4270845       |
| <b>Lmo2</b>          | 1.95607271  | 1.90E-30            | 55.6084602       | 116.82351        |
| <b>F5</b>            | 1.93796162  | 2.99E-10            | 0.12774523       | 1.13828779       |
| <b>Lcp2</b>          | 1.91276548  | 4.22E-14            | 5.94840007       | 13.5098457       |
| <b>C130026I21Rik</b> | 1.90946702  | 1.83E-09            | 0.73940969       | 4.81694464       |
| <b>Bahcc1</b>        | 1.90228051  | 2.45E-09            | 0.15304315       | 0.96433363       |
| <b>Kcnk13</b>        | 1.88131314  | 1.26E-08            | 1.6054748        | 5.25074646       |
| <b>Frmd4b</b>        | 1.85312474  | 7.92E-10            | 0.09404738       | 1.49918252       |
| <b>Fam63a</b>        | 1.8401457   | 1.80E-37            | 42.7628947       | 82.2399708       |
| <b>Abcd2</b>         | 1.79244643  | 7.22E-09            | 0.09968091       | 1.32099872       |
| <b>Mcoln2</b>        | 1.76406045  | 2.41E-07            | 3.20327793       | 8.07017656       |
| <b>Gm15433</b>       | 1.74023242  | 1.14E-06            | 3.52595314       | 13.2340858       |
| <b>Gpr176</b>        | 1.72960188  | 2.39E-07            | 2.79210121       | 6.33060458       |
| <b>Selplg</b>        | 1.71969176  | 9.85E-07            | 0.69707114       | 3.38250772       |
| <b>Btbd3</b>         | 1.7147283   | 1.21E-08            | 0.02022204       | 1.08431471       |
| <b>Atf3</b>          | 1.71292264  | 5.40E-08            | 9.23745287       | 19.3484612       |
| <b>Cacna1a</b>       | 1.70334421  | 4.14E-06            | 0.69364653       | 1.94377867       |
| <b>Rapgef5</b>       | 1.70237633  | 1.26E-07            | 0.12251547       | 1.46760856       |
| <b>AI504432</b>      | 1.69101564  | 1.31E-06            | 0.23521782       | 1.32258641       |
| <b>Vwf</b>           | 1.66199956  | 1.25E-05            | 0.3793649        | 1.25149988       |
| <b>Pou2f2</b>        | 1.65786898  | 1.62E-05            | 0.54999942       | 1.63248578       |
| <b>Phc1</b>          | 1.62959109  | 1.78E-07            | 0.02338476       | 1.10937897       |
| <b>Runx3</b>         | 1.62409948  | 7.20E-08            | 7.90820689       | 14.6084937       |
| <b>Hist1h1c</b>      | 1.62010801  | 1.23E-21            | 97.1804108       | 163.756222       |
| <b>Tmem176b</b>      | 1.60993228  | 5.23E-05            | 4.63661582       | 10.8335128       |

**Supplementary Table 5: Primer sequences (qPCR)**

|                | Forward                | Reverse                 |
|----------------|------------------------|-------------------------|
| <b>hGAPDH</b>  | GCAAATTCATGGCACCCTC    | TCGCCCCACTTGATTTTGGG    |
| <b>hPSMB8</b>  | TTACCTGCTTGGCACCATGT   | GCTGCCGACACTGAAATACG    |
| <b>hPSMB9</b>  | ACAGCCTTTTGGCATTGGTG   | GCAATAGCGTCTGTGGTGAAG   |
| <b>hTAP1</b>   | CCAGTGGTCTGTTGACTCCC   | AATGTCAGCCCCTGTAGCAC    |
| <b>hTAP2</b>   | CCTTGAACAATGTCGGCAGC   | AAGTGCAGCACCCCTCCTTAC   |
| <b>hMX1</b>    | CAGCCTGCTGACATTGGGTA   | CATTACTGGGGACCACCACC    |
| <b>hOAS2</b>   | CAGGAACCCGAACAGTTCCC   | AGGACAAGGGTACCATCGGA    |
| <b>hSTAT1</b>  | CACCTAACGTGCTGTGCGTA   | CCACTGAGACATCCTGCCAC    |
| <b>hIFIT1</b>  | ATGCGATCTCTGCCTATCGC   | CCTGCCTTAGGGGAAGCAA     |
| <b>hDDX58</b>  | AGAGCACTTGTGGACGCTTTA  | TTGTTTTGCCACGTCCAGTC    |
| <b>hIFIH1</b>  | TTGGACTCGGGAATTCGTGG   | AACGATGGAGAGGGCAAGTC    |
| <b>hSTING1</b> | CATGGGCTGGCATGGTCATA   | CCCCGTAGCAGGTTGTTGTA    |
| <b>hCGAS</b>   | CTGGCTTTCAGCAAAAGTTAGG | GATAGCCGCCATGTTTCTTCTTG |
| <b>hIFNB1</b>  | CTTTGCTCTGGCACAACAGG   | GTGGAGAAGCACAACAGGAGA   |
| <b>mGapdh</b>  | TATGTCGTGGAGTCTACTGG   | GAGTTGTCATATTTCTCGTG    |
| <b>mPsmb8</b>  | GGAACGCATCTCCGTGTCTG   | AGTCCTGGTCCCTTCTTGTC    |
| <b>mPsmb9</b>  | CCACACCGGGACAACCATC    | GAGGGGAGAGCTTGTCGAAC    |
| <b>mTap1</b>   | CTTGATCCGGAAGCCACTCC   | GCTGAGCTGCTGGGTGATAA    |
| <b>mTap2</b>   | GCAGATTCTGGCTGGAGAGG   | ACGTTGCTCAGCATATCCCC    |
| <b>mIfnb1</b>  | TGGGAGATGTCCTCAACTGC   | CCAGGCGTAGCTGTTGTA      |
